# Supplementary material
Source: Springer Nature journal article supplement (https://www.springermedizin.de/resource/supplementary/12968_2011_2014_MOESM2_ESM.pdf/9581134)

Pre-injury

Post-injury

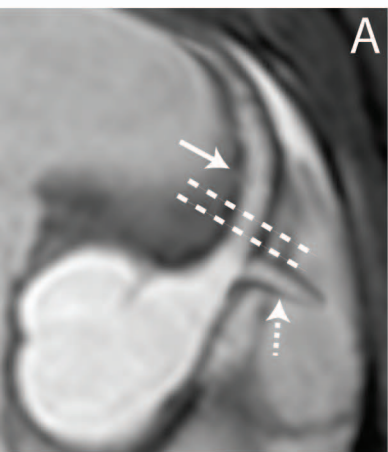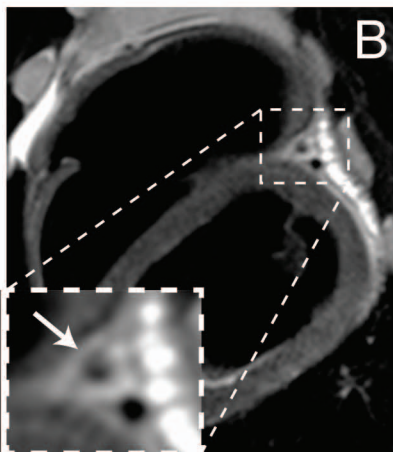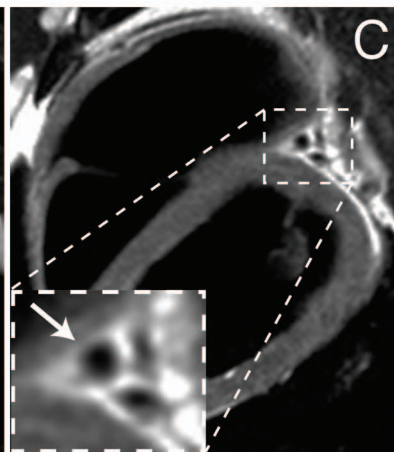

T2-STIR

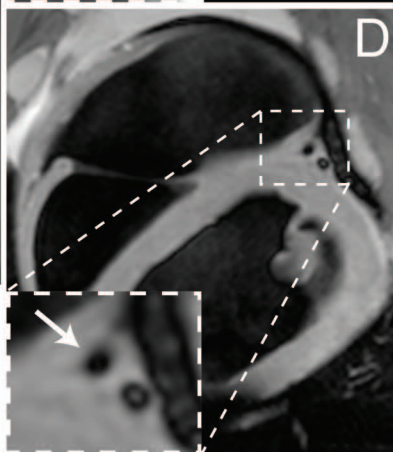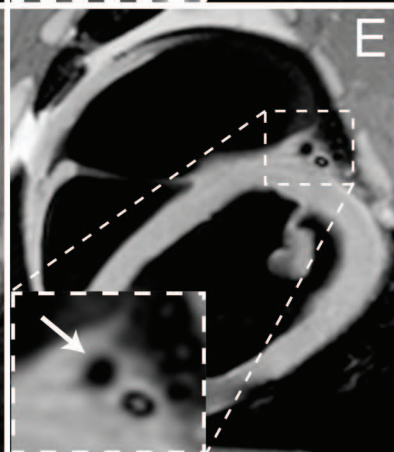

T2W

Supplement: MOESM2 [file 9581134]
